# Supplementary material for: Gorilla MHC class I gene and sequence variation in a comparative context
Source: PubMed Central journal article supplement (PMC5400801; doi:10.1007/s00251-017-0974-x), 2017-03-22
Supplement: 251_2017_974_MOESM1_ESM.pdf [file 251_2017_974_MOESM1_ESM.pdf]

Electronic Supplementary Material 1. Sample information

| Species                         | Common name             | Name             | Studbook ID   | Sex | Geographical origin/birthplace                                                    | Birth origin | Reference                                                           |
|---------------------------------|-------------------------|------------------|---------------|-----|-----------------------------------------------------------------------------------|--------------|---------------------------------------------------------------------|
| <i>Gorilla beringei graueri</i> | Eastern lowland gorilla | Mukisi           | 9912          | M   | Walikale region, Democratic Republic of the Congo                                 | Wild born    | Jensen-Seaman and Kidd (2001)                                       |
| <i>Gorilla gorilla diehli</i>   | Cross River gorilla     | Nyango           | 9941          | F   | Mamfe (Cross River region), Cameroon                                              | Wild born    | Thalmann et al. (2007); Good et al. (2013)                          |
| <i>Gorilla gorilla gorilla</i>  | Western lowland gorilla | Makulla          | 0051          | F   | Guinea (Equatorial?)                                                              | Wild born    | Good et al. (2013); Wilms and Bender (2015)                         |
| <i>Gorilla gorilla gorilla</i>  | Western lowland gorilla | Willie B         | 0115          | M   | Cameroon                                                                          | Wild born    | Wilms and Bender (2015)                                             |
| <i>Gorilla gorilla gorilla</i>  | Western lowland gorilla | Samson II        | 0137          | M   | Congo                                                                             | Wild born    | Wilms and Bender (2015)                                             |
| <i>Gorilla gorilla gorilla</i>  | Western lowland gorilla | Beta             | 0160          | F   | Unknown                                                                           | Wild born    | Wilms and Bender (2015)                                             |
| <i>Gorilla gorilla gorilla</i>  | Western lowland gorilla | Ozoum            | 0175          | M   | Unknown                                                                           | Wild born    | Wilms and Bender (2015)                                             |
| <i>Gorilla gorilla gorilla</i>  | Western lowland gorilla | Paki             | 0191          | F   | Unknown                                                                           | Wild born    | Wilms and Bender (2015)                                             |
| <i>Gorilla gorilla gorilla</i>  | Western lowland gorilla | Oko              | 0192          | F   | Unknown                                                                           | Wild born    | Wilms and Bender (2015)                                             |
| <i>Gorilla gorilla gorilla</i>  | Western lowland gorilla | Banga            | 0224          | F   | Unknown                                                                           | Wild born    | Wilms and Bender (2015)                                             |
| <i>Gorilla gorilla gorilla</i>  | Western lowland gorilla | Donna            | 0336          | F   | Cameroon                                                                          | Wild born    | Wilms and Bender (2015)                                             |
| <i>Gorilla gorilla gorilla</i>  | Western lowland gorilla | Carlos           | 0506          | M   | Unknown                                                                           | Wild born    | Wilms and Bender (2015)                                             |
| <i>Gorilla gorilla gorilla</i>  | Western lowland gorilla | Machi            | 0609          | F   | Yerkes National Primate Center, GA, USA                                           | Captive born | Wilms and Bender (2015)                                             |
| <i>Gorilla gorilla gorilla</i>  | Western lowland gorilla | Murphy           | 0684          | M   | Henry Doorly Zoo and Aquarium, NE, USA                                            | Captive born | Wilms and Bender (2015)                                             |
| <i>Gorilla gorilla gorilla</i>  | Western lowland gorilla | Rok              | 0701          | M   | Yerkes National Primate Center, GA, USA                                           | Captive born | Wilms and Bender (2015)                                             |
| <i>Gorilla gorilla gorilla</i>  | Western lowland gorilla | Ivan             | 0710          | M   | Republic of Congo                                                                 | Wild born    | Wilms and Bender (2015)                                             |
| <i>Gorilla gorilla gorilla</i>  | Western lowland gorilla | Gorgo            | 0766          | M   | Zoo Krefeld, Germany                                                              | Captive born | Wilms and Bender (2015)                                             |
| <i>Gorilla gorilla gorilla</i>  | Western lowland gorilla | N'Diki           | 0858          | F   | Cameroon                                                                          | Wild born    | Wilms and Bender (2015)                                             |
| <i>Gorilla gorilla gorilla</i>  | Western lowland gorilla | Bebe France      | 0860          | F   | Cameroon                                                                          | Wild born    | Good et al. (2013); Wilms and Bender (2015)                         |
| <i>Gorilla gorilla gorilla</i>  | Western lowland gorilla | Binti Jua        | 1047          | F   | Columbus Zoo and Aquarium, OH, USA                                                | Captive born | Wilms and Bender (2015)                                             |
| <i>Gorilla gorilla gorilla</i>  | Western lowland gorilla | Kwan             | 1107          | M   | North Carolina Zoo, NC, USA                                                       | Captive born | Wilms and Bender (2015)                                             |
| <i>Gorilla gorilla gorilla</i>  | Western lowland gorilla | Bulera           | 1120          | F   | Lincoln Park Zoo, IL, USA                                                         | Captive born | Wilms and Bender (2015)                                             |
| <i>Gorilla gorilla gorilla</i>  | Western lowland gorilla | Baraka Y Mwelu   | 1273          | M   | Smithsonian National Zoological Park, DC, USA                                     | Captive born | Wilms and Bender (2015)                                             |
| <i>Gorilla gorilla gorilla</i>  | Western lowland gorilla | Abeeku           | 1516          | M   | Diergaard Blijdorp, NL                                                            | Captive born | Wilms and Bender (2015)                                             |
| <i>Gorilla gorilla gorilla</i>  | Western lowland gorilla | Chella aka Rambo | 1912          | M   | Cameroon                                                                          | Wild born    | Thalmann et al. (2007); Wilms and Bender (2015)                     |
| <i>Gorilla gorilla gorilla</i>  | Western lowland gorilla | Emma             | 1914          | F   | East Province, Cameroon                                                           | Wild born    | Thalmann et al. (2007); Good et al. (2013); Wilms and Bender (2015) |
| <i>Gorilla gorilla gorilla</i>  | Western lowland gorilla | Jumbo            | 1916          | F   | Bertoua, East Province, Cameroon                                                  | Wild born    | Thalmann et al. (2007); Good et al. (2013); Wilms and Bender (2015) |
| <i>Gorilla gorilla gorilla</i>  | Western lowland gorilla | Pitchou          | 1925          | F   | Lolodore-Lolodorf, South West, Cameroon                                           | Wild born    | Thalmann et al. (2007); Wilms and Bender (2015)                     |
| <i>Gorilla gorilla gorilla</i>  | Western lowland gorilla | Akiba            | 1926          | F   | East Province (120 km from Belabo), Cameroon                                      | Wild born    | Thalmann et al. (2007); Good et al. (2013); Wilms and Bender (2015) |
| <i>Gorilla gorilla gorilla</i>  | Western lowland gorilla | Batek            | 1927          | M   | Batouri, East Province, Cameroon                                                  | Wild born    | Thalmann et al. (2007); Good et al. (2013); Wilms and Bender (2015) |
| <i>Gorilla gorilla gorilla</i>  | Western lowland gorilla | Brighter         | 1928          | F   | Cameroon                                                                          | Wild born    | Wilms and Bender (2015)                                             |
| <i>Gorilla gorilla gorilla</i>  | Western lowland gorilla | Twigs            | 1929          | F   | Cameroon                                                                          | Wild born    | Wilms and Bender (2015)                                             |
| <i>Gorilla gorilla gorilla</i>  | Western lowland gorilla | Anthal           | 1930          | F   | South Province (village: Nkoma, subdivision: Mvangan, division: Muilla), Cameroon | Wild born    | Thalmann et al. (2007); Good et al. (2013); Wilms and Bender (2015) |
| <i>Gorilla gorilla gorilla</i>  | Western lowland gorilla | Arnaud           | 1931          | M   | South Province (village: Nkoma, subdivision: Mvangan, division: Muilla), Cameroon | Wild born    | Thalmann et al. (2007); Good et al. (2013); Wilms and Bender (2015) |
| <i>Gorilla gorilla gorilla</i>  | Western lowland gorilla | EB (JC)          | Cat. 89072703 | F   | Unknown                                                                           | Unknown      |                                                                     |

References

- Good JM, Wiebe V, Albert FW, Burbano HA, Kircher M, Green RE, Halbwx M, André C, Atencia R, Fischer A, Pääbo S (2013) Comparative population genomics of the ejaculate in humans and the great apes. *Mol Biol Evol* 30:964-976. doi: 10.1093/molbev/mst005
- Jensen-Seaman MI, Kidd KK (2001) Mitochondrial DNA variation and biogeography of eastern gorillas. *Mol Ecol* 10:2241-2247
- Thalmann O, Fischer A, Lankester F, Pääbo S, Vigilant L (2007) The complex evolutionary history of gorillas: insights from genomic data. *Mol Biol Evol* 24:146-158
- Wilms TM, Bender U (2015) International studbook for the western lowland gorilla *Gorilla g. gorilla* Savage & Wyman, 1847. Frankfurt Zoo, Frankfurt
