# Supplementary material for: Gorilla MHC class I gene and sequence variation in a comparative context
Source: PubMed Central journal article supplement (PMC5400801; doi:10.1007/s00251-017-0974-x), 2017-03-22
Supplement: 251_2017_974_MOESM2_ESM.pdf [file 251_2017_974_MOESM2_ESM.pdf]

**Electronic Supplementary Material 2.** Genealogies of captive born gorillas

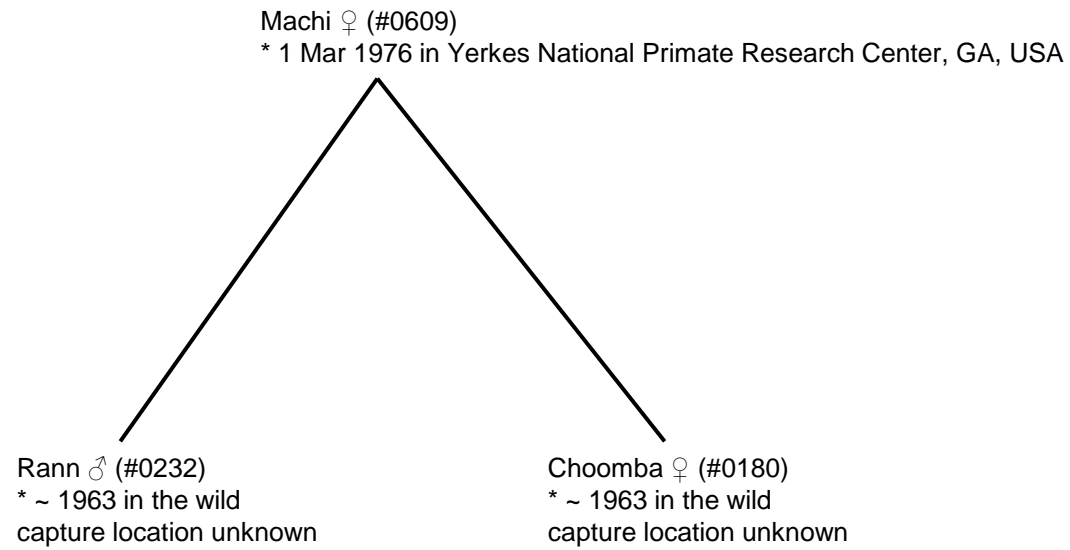

Murphy ♂ (#0684)  
\* 17 Dec 1978 in Henry Doorly Zoo and Aquarium, NE, USA

Casey I ♂ (#0083)  
\* ~ 1956 in the wild  
captured in West Africa

Bridgette ♀ (#0226)  
\* ~ 1961 in the wild  
captured in West Africa

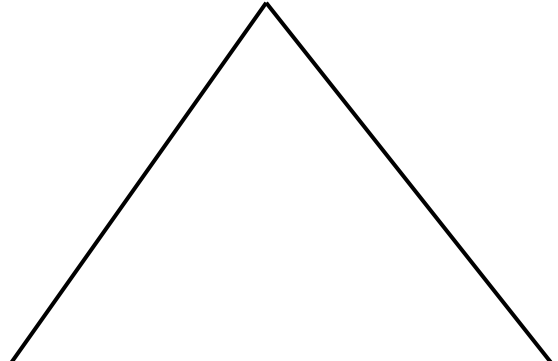

Rok ♂ (#0701)  
\* 21 Aug 1979 in Zoo Atlanta, GA, USA

Ozoum ♂ (#0175)  
\* ~ 1961 in the wild  
capture location unknown

Banga ♀ (#0224)  
\* ~ 1964 in the wild  
capture location unknown

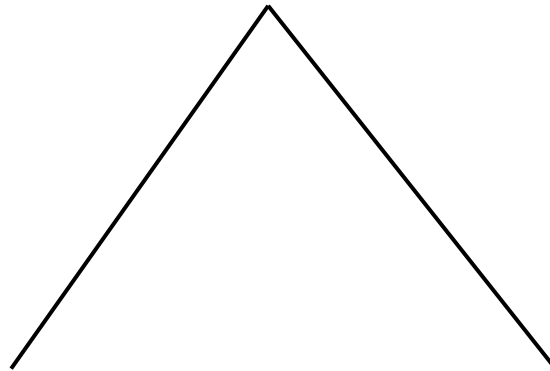

Gorgo ♂ (#0766)  
\* 28 Jun 1981 in Zoo Krefeld, Germany

Massa ♂ (#0578)  
\* ~ 1971 in the wild  
capture location unknown

Boma ♀ (#0588)  
\* ~ 1973 in the wild  
captured in Cameroon

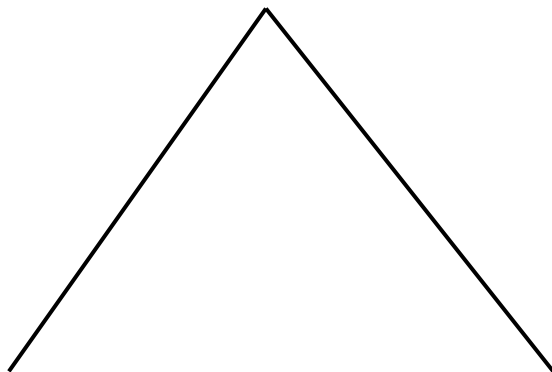

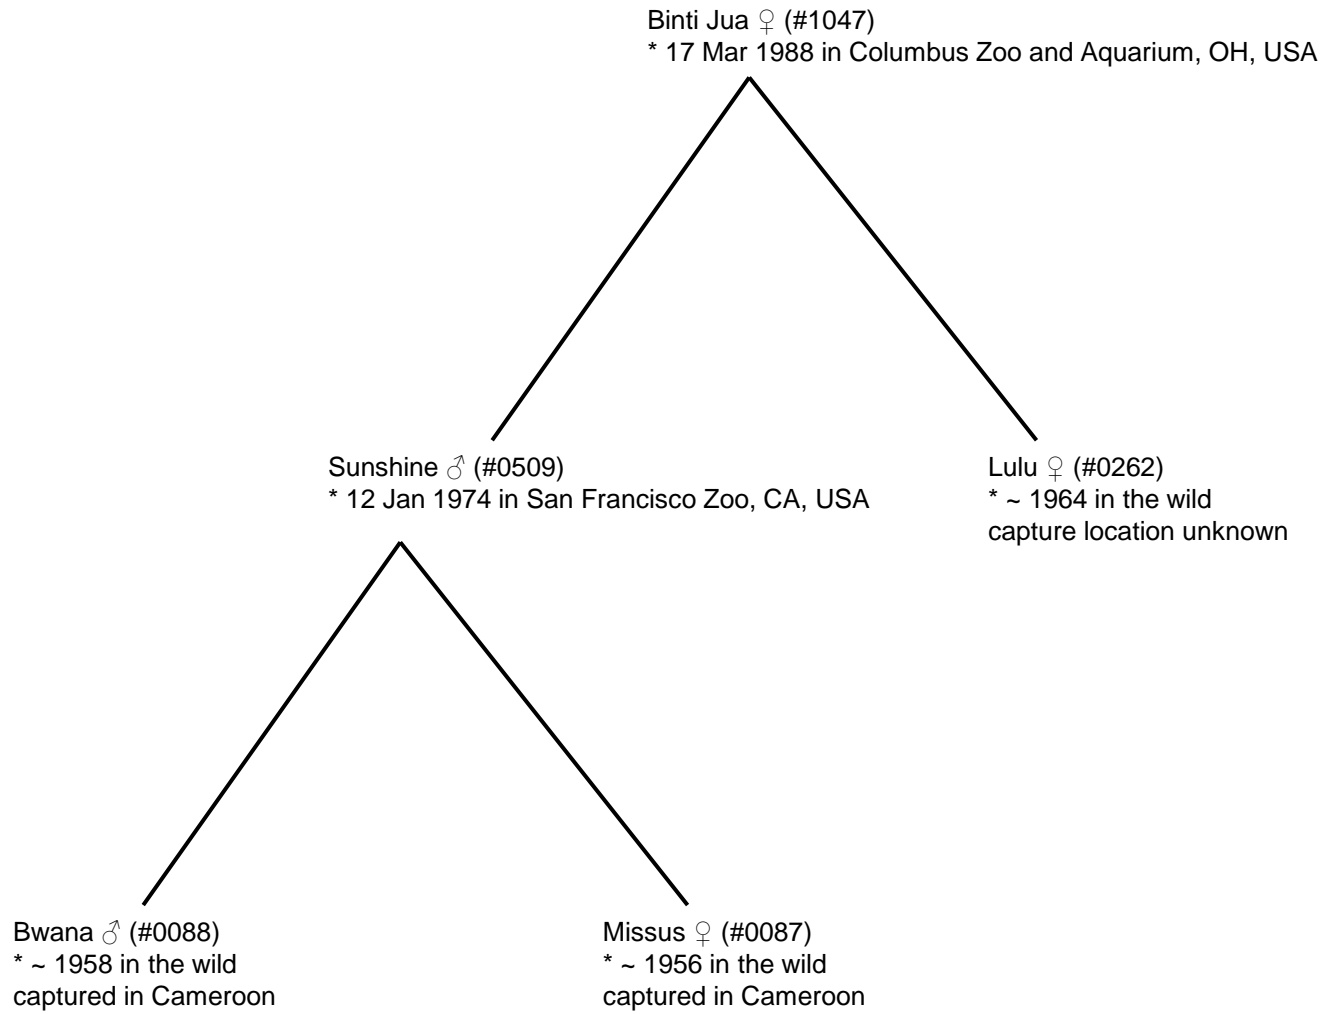

Kwan ♂ (#1107)  
\* 02 Mar 1989 in North Carolina Zoo, NC, USA

Carlos ♂ (#0506)  
\* ~ 1970 in the wild  
capture location unknown

Hope ♀ (#0559)  
\* 30 Oct 1974 in Gulf South Research Institute, FL, USA

Jimmie Gee ♂ (#0388)  
\* ? in the wild  
capture location unknown

Sheila ♀ (#0390)  
\* ? in the wild  
capture location unknown

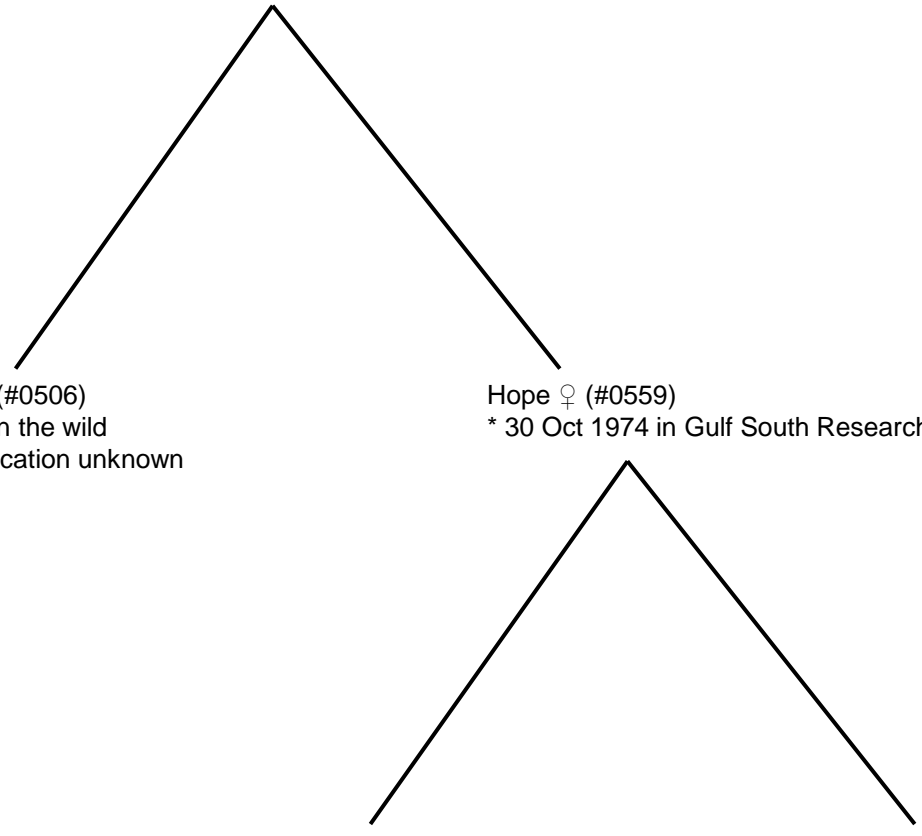

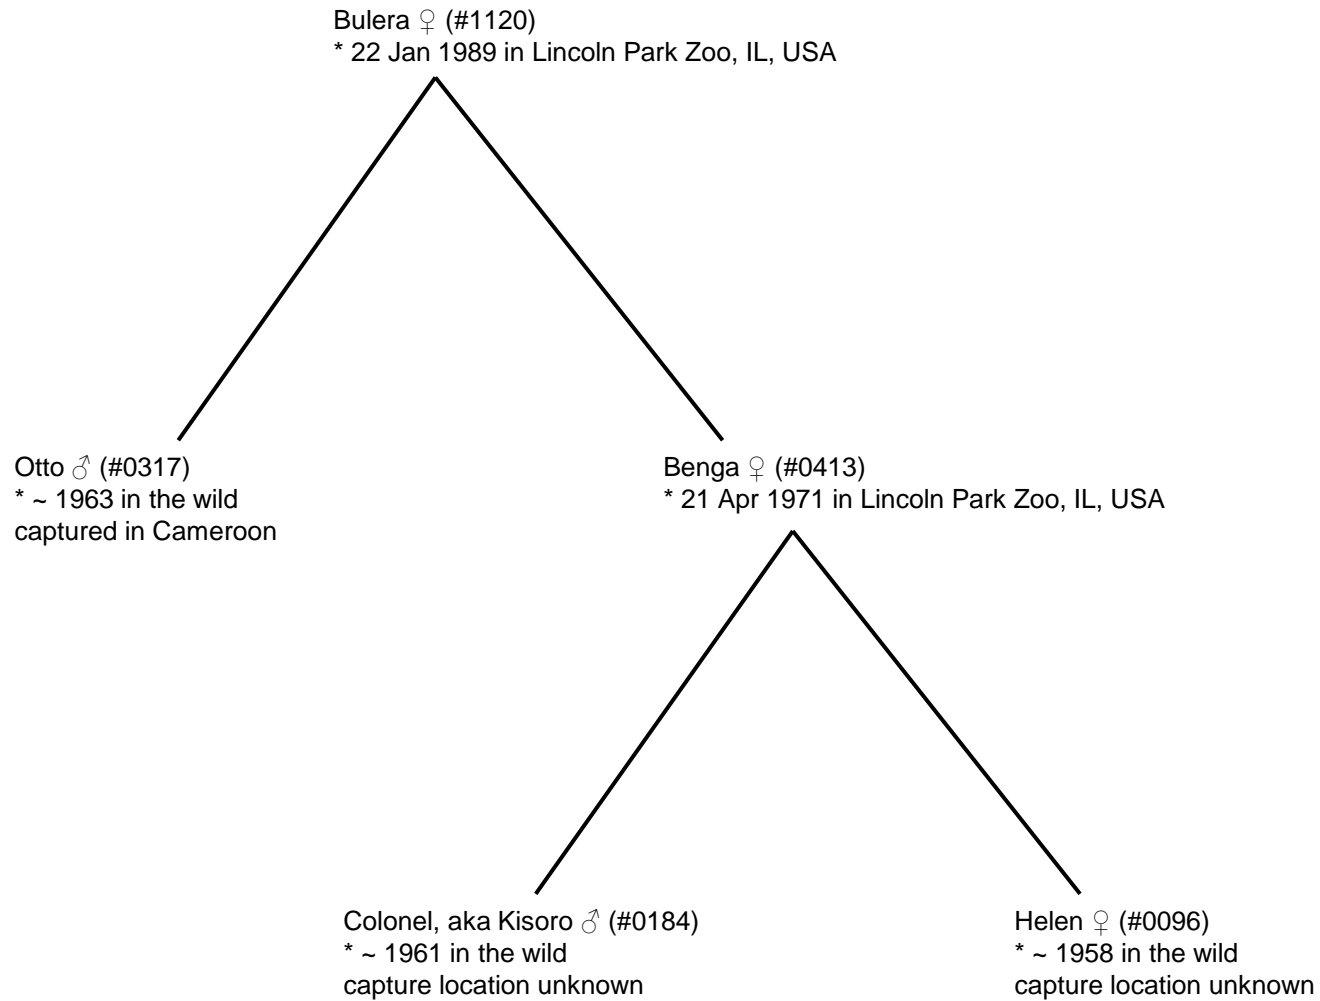

Baraka Y Mweu ♂ (#1273)  
\* 11 Apr 1992 in Smithsonian National Zoological Park, DC, USA

Augustus ♂ (#0771)  
\* 9 Aug 1981 in Bronx Zoo, NY, USA

Haloko ♀ (#0393)  
\* ~ 1967 in the wild  
capture location unknown

Bendera ♂ (#0216)  
\* ~ 1963 in the wild  
capture location unknown

Tunuka ♀ (#0217)  
\* ~ 1963 in the wild  
captured in Algeria

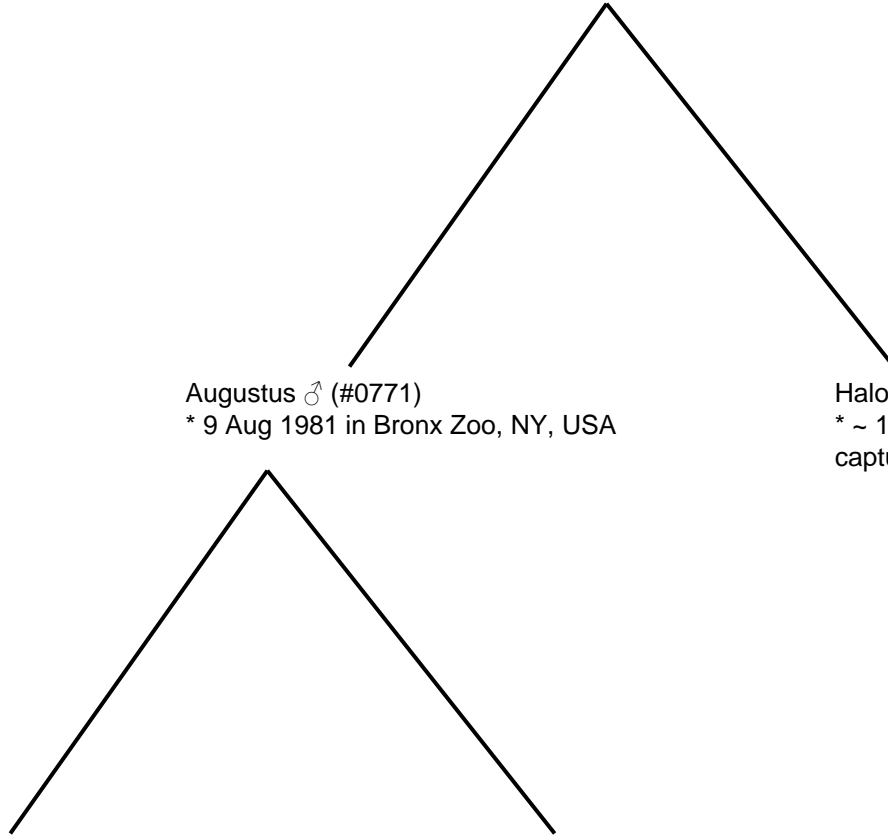



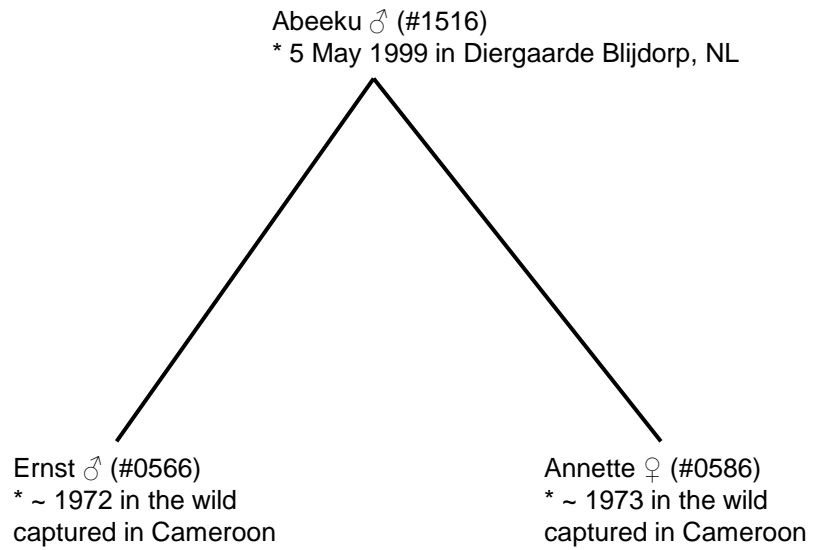

## Reference

Wilms TM, Bender U (2015) International studbook for the western lowland gorilla *Gorilla g. gorilla* Savage & Wyman, 1847. Frankfurt Zoo, Frankfurt
