# Supplementary material for: Gorilla MHC class I gene and sequence variation in a comparative context
Source: PubMed Central journal article supplement (PMC5400801; doi:10.1007/s00251-017-0974-x), 2017-03-22
Supplement: 251_2017_974_MOESM3_ESM.pdf [file 251_2017_974_MOESM3_ESM.pdf]

**Electronic Supplementary Material 3.** Primer pairs used for the amplification of gorilla MHC class I genes

| <b>Locus</b>             | <b>Primer name</b> | <b>Sequence (5'-3')</b>       | <b>Expected PCR product size in bp</b> |
|--------------------------|--------------------|-------------------------------|----------------------------------------|
| Gorilla <i>MHC-A/Oko</i> | Gogo_A/Oko_F       | GCGGACMCAGTTCTCACTSCCATTG     | ~ 3160/3207                            |
|                          | Gogo_A/Oko_R       | GCCTACARGAACACAGACACATKCAGG   |                                        |
| Gorilla <i>MHC-B</i>     | Gogo_B_F           | GTCGKGTCCCTTCTCCRGGATACTCG    | 3020-3033                              |
|                          | Gogo_B_R           | GRCAGCTGTCTCAGGCTACAGAAAACAAC |                                        |
| Gorilla <i>MHC-C</i>     | Gogo_C_F           | CGWCGGGTCCCTTCTCCTGAATACTCA   | 3079                                   |
|                          | Gogo_C_R           | TGCATCTCAGTCCCACACAGGCAG      |                                        |
