# Supplementary material for: Gorilla MHC class I gene and sequence variation in a comparative context
Source: PubMed Central journal article supplement (PMC5400801; doi:10.1007/s00251-017-0974-x), 2017-03-22

**Electronic Supplementary Material 5.** Domain-by-domain phylogenetic analysis of the newly identified *Gogo-B\*07* gene. Neighbor-joining trees were constructed from available full-length genomic sequences of *MHC-B* and *-C* genes. Shown in the top left corner is the size of the genomic segments (1-5) which were used for the phylogenetic reconstruction. Black, grey and white circles correspond to bootstrap values of  $\geq 95\%$ ,  $\geq 80\%$  or  $\geq 50\%$ , respectively. Black triangles represent compressed *MHC-B* and *-C* sequences of human (*H*), chimpanzee (*C*), gorilla (*G*) and orangutan (*O*) with the total number of sequences given in parentheses. Highlighted in blue are sequences of *Gogo-B\*07* alleles. Highlighted in red are sequences of *Gogo-B\*03* alleles co-segregating with *Gogo-B\*07*. Sequences of other gorilla alleles identified in the present study are highlighted in bold. *HLA*, human; *Patr*, *Pan troglodytes*; *Gogo*, *Gorilla gorilla*; *Gobe*, *Gorilla beringei*; *Popy*, *Pongo pygmaeus*; *Mamu*, *Macaca mulatta*

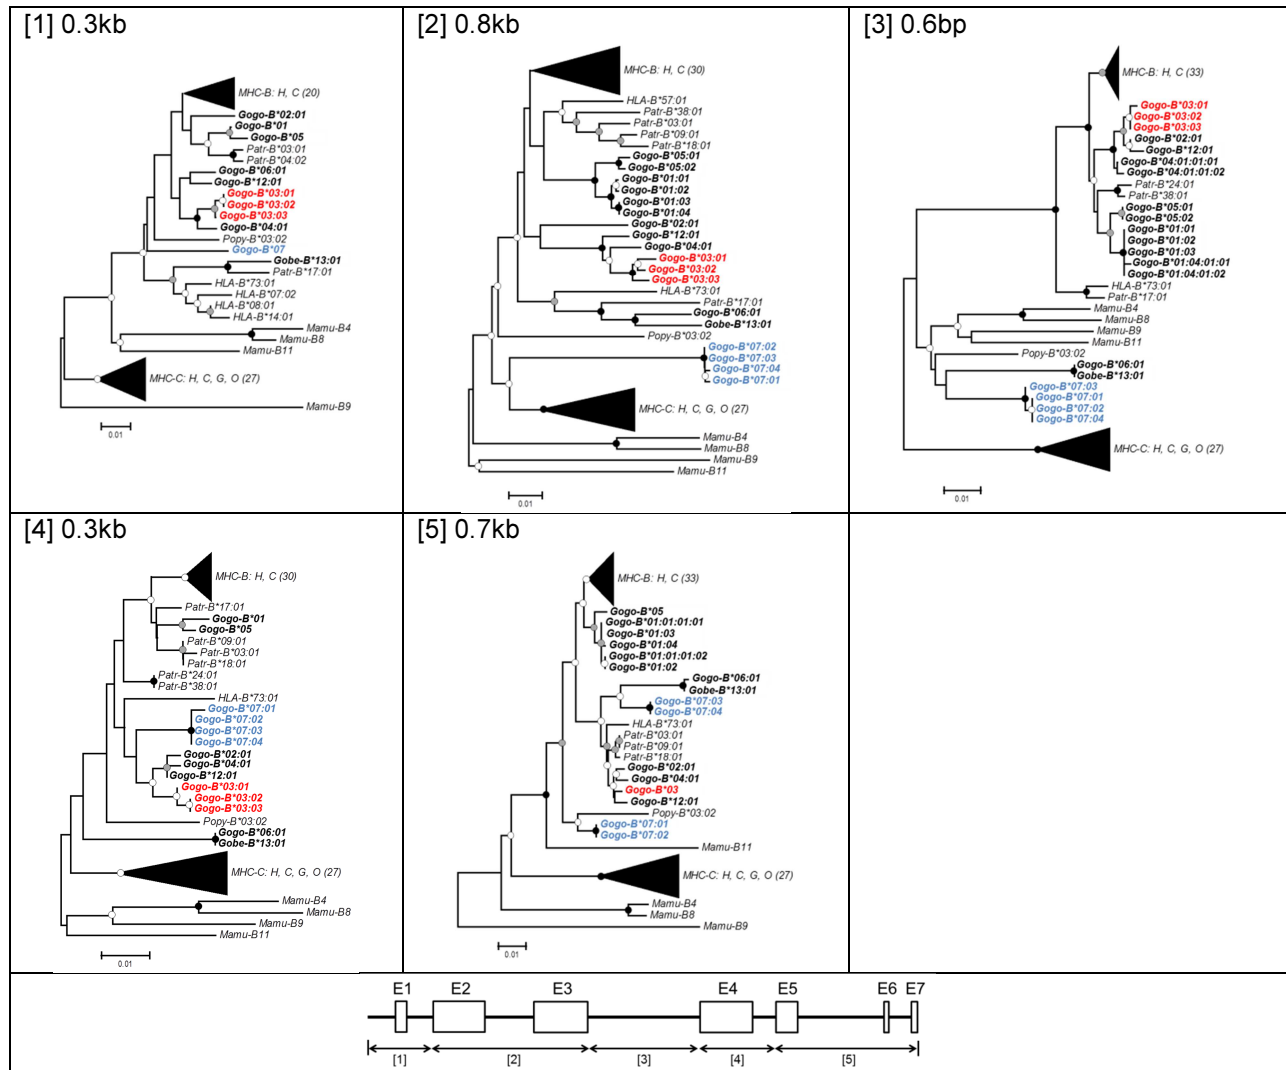

Supplement: 251_2017_974_MOESM5_ESM.pdf [file 251_2017_974_MOESM5_ESM.pdf]
